# Supplementary material for: Influence of Primary Healthcare Accessibility on Adherence to Prescribed Medication Among Geriatric Patients with Chronic Diseases in Central Uganda: A Cross-Sectional Study
Source: Research Square preprint supplement (doi:10.21203/rs.3.rs-7727568/v1), 2025-11-19
Supplement: Supplementary file 1 [file 9703d7f5acffb715dbc9b8e2.docx]

**Supplementary Material 1: Study Questionnaire**

Study title: Adherence to Prescribed Medications Among Elderly Persons with Hypertension and Diabetes in Primary Health Care Facilities: A Case Study of Wakiso District.

**Section A: Socio-demographic characteristics**

|  |  |  |  |
| --- | --- | --- | --- |
| Study ID |  | Facility |  |
| Age |  | Clinic ID |  |
| Sex | ☐Male ☐Female | Tel: |  |
| Occupation | | ☐ Business (specify)………………... ☐Professional(specify)……...……….... ☐Unemployed ☐other………………... | |
| Religion | | ☐Catholic ☐Muslim ☐Anglican ☐Pentecostal ☐ Other (Specify) ……………………. | |
| Marital status | | ☐Single ☐Married/cohabiting ☐Widow/widower  ☐Other (Specify)…………………………. | |
| Nature of Address: | | ☐urban ☐Rural ☐Suburban | |
| Highest Education level | | ☐Primary school ☐Secondary school ☐Technical/ Vocational ☐University ☐No formal education | |
| Patients’ disease | | ☐Hypertension ☐ Diabetes ☐Both | |

**Section B: Medication adherence levels**

How often do you take your medication?

| S/No. | Doctor’s prescription | Frequency of medication | Tablets given, for a given period of time | Tablets taken so far, for a given period of time | (Medicines taken)/(What should be taken) | Percentage adherence (%) |
| --- | --- | --- | --- | --- | --- | --- |
| 1 |  |  |  |  |  |  |
| 2 |  |  |  |  |  |  |
| 3 |  |  |  |  |  |  |
| 4 |  |  |  |  |  |  |
| 5 |  |  |  |  |  |  |
| 6 |  |  |  |  |  |  |
|  |  |  |  |  |  |  |

**Section C: Factors influencing medication adherence**

| S/No. | Factor | Response |
| --- | --- | --- |
| **Individual factors influencing adherence** | | |
|  | Do you understand the doctor’s prescription? | ☐YES ☐NO |
|  | How do you interpret the doctor’s prescription on this medication |  |
|  | Is the interpretation synonymous with the doctor’s prescription | ☐YES ☐NO |
|  | Can you clearly see the doctor’s prescriptions? | ☐YES ☐NO |
|  | Does your eyesight influence how you take your medicine | ☐YES ☐NO |
|  | Do you clearly hear while the healthcare is talking to you while at the clinic | ☐YES ☐NO |
|  | Does your hearing influence how you take your medicine | ☐YES ☐NO |
|  | Have you ever had any bad experience with your medication? | ☐YES ☐NO |
|  | If yes, please state your experience | ………………………………………………………  ………………………………………………………… |
|  | Did this experience negatively affect your adherence to medication | ☐YES ☐NO |
|  | Does your religion ever affect your adherence to medication? | ☐YES ☐NO |
|  | If yes, please state how | …………………………………………………………  ………………………………………………………… |
|  | Do you stay with people home? | ☐YES ☐NO |
|  | Does their stay impact your adherence | ☐POSTIVELY ☐NEGATIVELY ☐NO |
|  | If yes 14 above, please state how | …………………………………………………………  ……………………………………………………….. |
|  | Do people in your community influence your medication adherence | ☐POSTIVELY ☐NEGATIVELY ☐NO |
|  | If yes, please explain how | …………………………………………………………..  …………………………………………………………. |
|  | Do you sometimes forget taking your medication? | ☐YES ☐NO |
|  | Do you sometime forget the doctor’s prescriptions for some medication? | ☐YES ☐NO |
|  | Do you ever feel fed-up of medications and end up missing taking medicines voluntarily | ☐YES ☐NO |
|  | Do you have any complementary medicines you use for the diabetes, hypertension, or both? | ☐YES ☐NO |
|  | If yes above, does the medication influence your medication adherence negatively? | ☐POSTIVELY ☐NEGATIVELY ☐NO |
|  | Does your culture influence your medication adherence | ☐POSTIVELY ☐NEGATIVELY ☐NO |
|  | If yes, please explain how | ……………………………………………………………  …………………………………………………………… |
|  |  |  |
| **Health facility factors** | | |
|  | Is the health facility accessible to you? | ☐YES ☐NO |
|  | Does health facility inaccessibility reduce your adherence? | ☐YES ☐NO |
|  | Do you sometimes fail to get medicines from your health facility because they are out of stock, and thus fail to adhere to medication? | ☐YES ☐NO |
|  | What is the average waiting time at your facility to get health services | …………………………………… |
|  | Is the waiting time at your facility too long that some time it makes you leave the medicines and end up missing taking medicine? | ☐YES ☐NO |
|  | Are the tablets too many that you fail to take all of them some time? | ☐YES ☐NO |
|  | Do you take various types of medicines, that sometimes you fail/forget to take all of them when you should be taking them? | ☐YES ☐NO |
|  | Does the way the healthcare worker relationship with you influence your adherence? | ☐YES ☐NO |
|  | If yes, does it negatively influence your adherence | ☐YES ☐NO |
|  | If yes, does it positively influence your adherence | ☐YES ☐NO |
|  | If yes, which behavior does your healthcare worker have, and how does it influence your adherence | ……………………………………………………………  …………………………………………………………… |
|  | What is the average time difference between your review dates? | ………………………………………… |
|  | Does the time difference between your review dates negatively influence your adherence | ☐YES ☐NO |
|  | If yes, please explain how? | …………………………………………………………  ………………………………………………………… |

Are there any other factors that influence your adherence that you may want to mention to us, and how do they influence your adherence?

1. …………………………………………………………………………………………………………………………………………………………………………………………………………………………………………………………………………………………………………
2. …………………………………………………………………………………………………………………………………………………………………………………………………………………………………………………………………………………………………………
3. …………………………………………………………………………………………………………………………………………………………………………………………………………………………………………………………………………………………………………
4. …………………………………………………………………………………………………………………………………………………………………………………………………………………………………………………………………………………………………………

Thank you for your time
